# Supplementary material
Source: PubMed Central journal article supplement (PMC2867603)
Supplement: NIHMS197066-supplement-supplement_1.pdf [file NIHMS197066-supplement-supplement_1.pdf]

**Table S1. Peptides detected in blood using quantitative peptidomics approach.**

| Protein                        | Sequence                  | Obs Mass | Theor Mass | Diff (ppm) | z | #T |
|--------------------------------|---------------------------|----------|------------|------------|---|----|
| Albumin                        | EAHKSEIAHRY               | 1339.69  | 1339.66    | 22         | 4 | 2  |
| Albumin                        | EAHKSEIAHRY               | 1339.72  | 1339.66    | 40         | 5 | 2  |
| Albumin                        | EAHKSEIAHRYN              | 1453.78  | 1453.71    | 38         | 3 | 2  |
| Albumin                        | EAHKSEIAHRYN              | 1453.74  | 1453.71    | 21         | 4 | 2  |
| Albumin                        | EAHKSEIAHRYN              | 1453.75  | 1453.71    | 28         | 5 | 2  |
| Albumin                        | YTQKAPQVSTPTLVEAAR        | 1959.02  | 1959.04    | -14        | 3 | 2  |
| Alpha-2-HS-glycoprotein        | APQGTGLGFRELA             | 1315.69  | 1315.69    | 0          | 2 | 1  |
| Apolipoprotein A-I             | SNPTLNEYHTR               | 1330.65  | 1330.63    | 17         | 3 | 1  |
| Apolipoprotein A-I             | DEPQSQWDKVKDF             | 1620.68  | 1620.74    | -37        | 3 | 3  |
| Apolipoprotein A-II            | SAGTSLVNFFSSLMNLEEKAPAA   | 2480.24  | 2480.23    | 6          | 3 | 2  |
| Apolipoprotein A-II            | SAGTSLVNFF                | 1041.50  | 1041.51    | -12        | 2 | 1  |
| Apolipoprotein A-II            | SSLMNLEEKAPAA             | 1456.68  | 1456.72    | -33        | 2 | 2  |
| Apolipoprotein C-I             | DLSGTLESIPDKLKEFGNTLEDKA  | 2619.33  | 2619.33    | 2          | 4 | 4  |
| apolipoprotein C-I             | DLSGTLESIPDKLKEFGNTLEDKAR | 2775.46  | 2775.43    | 12         | 4 | 3  |
| Apolipoprotein C-III           | GWMDNHFR                  | 1061.45  | 1061.45    | 2          | 3 | 1  |
| Apolipoprotein E               | LGKEVQAAQAR               | 1169.64  | 1169.65    | -8         | 3 | 2  |
| Apolipoprotein J               | ASGIIDTLFQDR              | 1334.69  | 1334.68    | 5          | 2 | 1  |
| Complement component 3         | LLWENGILL                 | 1070.61  | 1070.58    | 28         | 2 | 1  |
| Enhancer of polycomb homolog 1 | RTLSAVPP                  | 839.46   | 839.49     | -37        | 2 | 1  |
| Fibrinogen alpha               | FLSEGGGVR                 | 920.46   | 920.47     | -10        | 2 | 1  |
| Fibrinogen alpha               | VPDLVPGSFK                | 1057.60  | 1057.58    | 20         | 2 | 2  |
| Fibrinogen alpha               | SPVPDLVPGSF               | 1113.56  | 1113.57    | -7         | 1 | 1  |
| Fibrinogen alpha               | SPVPDLVPGSF               | 1113.60  | 1113.57    | 28         | 2 | 1  |
| Fibrinogen alpha               | SPVPDLVPGSFK              | 1241.64  | 1241.67    | -17        | 2 | 2  |
| Fibrinogen alpha               | MSPVPDLVPGSF              | 1244.59  | 1244.61    | -19        | 1 | 1  |
| Fibrinogen alpha               | MSPVPDLVPGSF              | 1244.64  | 1244.61    | 24         | 2 | 1  |
| Fibrinogen alpha               | MSPVPDLVPGSFK             | 1372.68  | 1372.71    | -20        | 2 | 2  |
| Fibrinogen alpha               | TDTEDKGEFLSEGGGV          | 1639.72  | 1639.72    | 0          | 2 | 2  |
| Fibrinogen alpha               | MADEAGSEAHREGETR          | 1744.79  | 1744.74    | 29         | 4 | 1  |
| Fibrinogen alpha               | TDTEDKGEFLSEGGGVR         | 1795.82  | 1795.82    | 1          | 2 | 2  |
| Fibrinogen alpha               | TDTEDKGEFLSEGGGVR         | 1795.81  | 1795.82    | -6         | 3 | 2  |
| Fibrinogen beta                | KEEPPSLRPAPPPISGGGY       | 1948.01  | 1948.01    | 5          | 3 | 2  |
| Fibrinogen beta                | KEEPPSLRPAPPPISGGGYR      | 2104.11  | 2104.11    | 0          | 4 | 2  |
| Hemoglobin alpha               | RVDPVNF                   | 845.43   | 845.44     | -17        | 2 | 1  |
| Hemoglobin alpha               | GAEALERMF                 | 1022.48  | 1022.49    | -4         | 2 | 1  |
| Hemoglobin alpha               | LSDLHAHKL                 | 1032.55  | 1032.57    | -17        | 3 | 2  |
| Hemoglobin alpha               | LSDLHAHKL                 | 1032.53  | 1032.57    | -36        | 4 | 2  |
| Hemoglobin alpha               | STVLTSKYR                 | 1053.56  | 1053.58    | -21        | 3 | 2  |
| Hemoglobin alpha               | RVDPVNFKLL                | 1199.71  | 1199.70    | 9          | 3 | 2  |
| Hemoglobin alpha               | AGHLDDLPGALSA             | 1235.61  | 1235.62    | -6         | 2 | 1  |
| Hemoglobin alpha               | VLSGEDKSNIKA              | 1259.67  | 1259.67    | -3         | 2 | 3  |
| Hemoglobin alpha               | VLSGEDKSNIKA              | 1259.67  | 1259.67    | -2         | 3 | 3  |

|                                    |                               |         |          |     |   |   |
|------------------------------------|-------------------------------|---------|----------|-----|---|---|
| Hemoglobin alpha                   | GAEALERMFASF                  | 1327.64 | 1327.62  | 14  | 2 | 1 |
| Hemoglobin alpha                   | VLSGEDKSNIAA                  | 1330.69 | 1330.71  | -11 | 3 | 3 |
| Hemoglobin alpha                   | AGHLDDLPGALSAL                | 1348.70 | 1348.70  | 0   | 2 | 1 |
| Hemoglobin alpha                   | SLDKFLASVSTVL                 | 1378.76 | 1378.77  | -4  | 2 | 2 |
| Hemoglobin alpha                   | ASHHPADFTPAVH                 | 1385.71 | 1385.65  | 9   | 2 | 1 |
| Hemoglobin alpha                   | ASHHPADFTPAVH                 | 1385.66 | 1385.65  | 9   | 3 | 1 |
| Hemoglobin alpha                   | RVDPVNFKLLSH                  | 1423.78 | 1423.79  | -12 | 3 | 2 |
| Hemoglobin alpha                   | RVDPVNFKLLSH                  | 1423.80 | 1423.79  | 5   | 4 | 2 |
| Hemoglobin alpha                   | ASLDKFLASVSTVL                | 1449.82 | 1449.81  | 9   | 2 | 2 |
| Hemoglobin alpha                   | ASHHPADFTPAVHA                | 1456.73 | 1456.68  | 30  | 2 | 1 |
| Hemoglobin alpha                   | ASHHPADFTPAVHA                | 1456.66 | 1456.68  | -16 | 3 | 1 |
| Hemoglobin alpha                   | ANAAGHLDDLPGALSA              | 1491.77 | 1491.73  | 27  | 2 | 1 |
| Hemoglobin alpha                   | ANAAGHLDDLPGALSAL             | 1604.83 | 1604.82  | 11  | 2 | 1 |
| Hemoglobin alpha                   | DF-phosphoTPAVHASLDKFL        | 1639.76 | 1639.80  | -26 | 2 | 2 |
| Hemoglobin alpha                   | ADALANAAGHLDDLPGALSA          | 1861.94 | 1861.92  | 12  | 2 | 1 |
| Hemoglobin alpha                   | ADALANAAGHLDDLPGALSAL         | 1975.03 | 1975.00  | 15  | 2 | 1 |
| Hemoglobin alpha                   | ADALANAAGHLDDLPGALSAL         | 1975.06 | 1975.00  | 30  | 3 | 1 |
| Hemoglobin alpha                   | AGHLDDLPGALSALSDDLHAKL        | 2250.17 | 2250.18  | -2  | 5 | 2 |
| Hemoglobin alpha                   | ANAAGHLDDLPGALSALSDDLHAKL     | 2506.31 | 2506.29  | 8   | 5 | 2 |
| Hemoglobin alpha                   | ADALANAAGHLDDLPGALSALSDDLHAKL | 2876.49 | 2876.48  | 5   | 5 | 2 |
| Hemoglobin alpha                   | VLSGEDKSNIAAWGKIGGHGAEYGAEAL  | 2927.46 | 2927.48  | -5  | 5 | 4 |
| Hemoglobin beta                    | KVVAGVAAALA                   | 968.57  | 968.60   | -28 | 2 | 2 |
| Hemoglobin beta                    | VHLTDAEKA                     | 982.55  | 982.51   | 37  | 2 | 2 |
| Hemoglobin beta                    | VHLTDAEKA                     | 982.50  | 982.51   | -8  | 3 | 2 |
| Hemoglobin beta                    | VATALAHKYH                    | 1109.63 | 1109.598 | 26  | 4 | 2 |
| Hemoglobin beta                    | DAEKA AVSGLWG                 | 1202.57 | 1202.59  | -21 | 2 | 2 |
| Hemoglobin beta                    | VHLTDAEKA AVS                 | 1239.65 | 1239.65  | 0   | 3 | 2 |
| Hemoglobin beta                    | VHLTDAEKA AVSG                | 1296.68 | 1296.67  | 8   | 3 | 2 |
| Hemoglobin beta                    | VVAGVAAALAHKYH                | 1405.76 | 1405.78  | -17 | 3 | 2 |
| Hemoglobin beta                    | VVAGVAAALAHKYH                | 1405.82 | 1405.78  | 24  | 4 | 2 |
| Hemoglobin beta                    | VHLTDAEKA AVSGLWG             | 1652.88 | 1652.85  | 19  | 2 | 2 |
| Hemoglobin beta                    | AFNDGLNHLDSLKGTF              | 1747.87 | 1747.85  | 11  | 3 | 2 |
| Hemoglobin beta                    | VHLTDAEKA AVSGLWGKVN          | 1994.05 | 1994.06  | -4  | 3 | 3 |
| Hemoglobin beta                    | VHLTDAEKA AVSGLWGKVN          | 1994.00 | 1994.06  | -31 | 4 | 3 |
| Hemoglobin beta                    | GKDFTPAAQA AFQKVVAGVAA        | 2046.06 | 2046.09  | -13 | 3 | 3 |
| Kallikrein 1-related peptidase b1  | SYDLMMLR                      | 1009.54 | 1009.53  | 12  | 2 | 1 |
| Kallikrein 1-related peptidase b22 | SVPTGADLSNDLMLL               | 1544.79 | 1544.78  | 10  | 2 | 1 |
| Kallikrein 1-related peptidase b22 | SVPTGADLSNDLMLLR              | 1700.87 | 1700.88  | -3  | 2 | 1 |
| Kallikrein 1-related peptidase b27 | HPEDKSNLMLLR                  | 1566.80 | 1566.78  | 13  | 4 | 2 |
| Kallikrein 1-related peptidase b27 | IPHPEDKSNLMLLR                | 1776.90 | 1776.92  | -11 | 4 | 2 |
| Kallikrein 1-related peptidase b3  | FLEYDYSNDLMLLR                | 1790.93 | 1790.85  | 34  | 2 | 1 |
| Kallikrein 1-related peptidase b9  | HPEYDYSNDLMLLR                | 1764.82 | 1764.81  | 1   | 3 | 1 |

|                        |            |         |         |     |   |   |
|------------------------|------------|---------|---------|-----|---|---|
| Kininogen-1            | RPPGFSP    | 756.37  | 756.39  | -28 | 2 | 1 |
| Kininogen-1            | RPPGFSPF   | 903.44  | 903.46  | -19 | 2 | 1 |
| Kininogen-1            | RPPGFSPFR  | 1059.52 | 1059.56 | -35 | 3 | 1 |
| Pregnancy zone protein | GVPMMGLDY  | 981.47  | 981.43  | 40  | 2 | 1 |
| Pregnancy zone protein | AMGVPMGLDY | 1183.53 | 1183.51 | 18  | 1 | 1 |
| Pregnancy zone protein | AMGVPMGLDY | 1183.54 | 1183.51 | 31  | 2 | 1 |

Abbreviations: Obs mass, observed monoisotopic mass; Theor Mass, theoretical monoisotopic mass; Diff (ppm), difference between observed and theoretical mass in parts per million; z, charge state; #T, number of isotopic tags incorporated during labeling.

**Table S2. Hemoglobin peptides detected in heart using quantitative peptidomics approach.**

| <b>Protein</b>   | <b>Sequence</b>        | <b>Obs Mass</b> | <b>Theor Mass</b> | <b>Diff (ppm)</b> | <b>z</b> | <b>#T</b> |
|------------------|------------------------|-----------------|-------------------|-------------------|----------|-----------|
| Hemoglobin alpha | RVDPVNF                | 845.46          | 845.440           | 25                | 2        | 1         |
| Hemoglobin alpha | LSDLHAHKL              | 1032.58         | 1032.572          | 6                 | 3        | 2         |
| Hemoglobin alpha | LSDLHAHKL              | 1032.59         | 1032.572          | 13                | 4        | 2         |
| Hemoglobin alpha | STVLTSKYR              | 1053.61         | 1053.582          | 27                | 2        | 2         |
| Hemoglobin alpha | STVLTSKYR              | 1053.59         | 1053.582          | 8                 | 3        | 2         |
| Hemoglobin alpha | VLSGEDKSNKA            | 1259.68         | 1259.672          | 6                 | 2        | 3         |
| Hemoglobin alpha | VLSGEDKSNKA            | 1259.64         | 1259.672          | -25               | 3        | 3         |
| Hemoglobin alpha | AGHLDDLPGALSAL         | 1348.73         | 1348.699          | 20                | 2        | 1         |
| Hemoglobin alpha | ASHHPADFTPAVH          | 1385.68         | 1385.648          | 24                | 2        | 1         |
| Hemoglobin alpha | ASHHPADFTPAVH          | 1385.69         | 1385.648          | 29                | 3        | 1         |
| Hemoglobin alpha | RVDPVNFKLLSH           | 1423.82         | 1423.794          | 22                | 2        | 2         |
| Hemoglobin alpha | RVDPVNFKLLSH           | 1423.80         | 1423.794          | 1                 | 3        | 2         |
| Hemoglobin alpha | RVDPVNFKLLSH           | 1423.79         | 1423.794          | -3                | 4        | 2         |
| Hemoglobin alpha | ASHHPADFTPAVHA         | 1456.71         | 1456.685          | 20                | 2        | 1         |
| Hemoglobin alpha | ASHHPADFTPAVHA         | 1456.71         | 1456.685          | 18                | 3        | 1         |
| Hemoglobin alpha | DF-phosphoTPAVHASLDKFL | 1639.84         | 1639.798          | 24                | 2        | 2         |
| Hemoglobin alpha | ADALANAAGHLDDLPGALSA   | 1861.98         | 1861.917          | 31                | 3        | 2         |
| Hemoglobin alpha | AGHLDDLPGALSALSDLHAHKL | 2250.24         | 2250.176          | 28                | 5        | 2         |
| Hemoglobin beta  | VHLTDAEKA              | 982.52          | 982.508           | 8                 | 3        | 2         |
| Hemoglobin beta  | VATALAHKYH             | 1109.61         | 1109.598          | 14                | 2        | 2         |
| Hemoglobin beta  | VATALAHKYH             | 1109.61         | 1109.598          | 8                 | 3        | 2         |
| Hemoglobin beta  | VATALAHKYH             | 1109.61         | 1109.598          | 8                 | 4        | 2         |
| Hemoglobin beta  | VHLTDAEKA AVS          | 1239.66         | 1239.646          | 12                | 3        | 2         |

Abbreviations: Obs mass, observed monoisotopic mass; Theor Mass, theoretical monoisotopic mass; Diff (ppm), difference between observed and theoretical mass in parts per million; z, charge state; #T, number of isotopic tags incorporated during labeling.

**Table S3. Summary of various cytosolic/mitochondrial protein fragments in *Cpe<sup>fat/fat</sup>* vs WT mice.**

| PROTEIN                         | SEQUENCE                                                                                                                                                             | Brain Region | <i>Cpe<sup>fat/fat</sup></i> :WT ± SEM (n) |
|---------------------------------|----------------------------------------------------------------------------------------------------------------------------------------------------------------------|--------------|--------------------------------------------|
| Actin (beta or gamma)           |                                                                                                                                                                      |              |                                            |
|                                 | ALPHAILRL                                                                                                                                                            | Amygdala     | 1.66 ± 0.24 (2)                            |
|                                 | ALPHAILRL                                                                                                                                                            | Hippo        | 1.22 ± 0.02 (2)                            |
|                                 | ALPHAILRL                                                                                                                                                            | Hypo         | 1.01 ± 0.21 (2)                            |
|                                 | ALPHAILRL                                                                                                                                                            | Striatum     | 1.58 ± 0.35 (5)                            |
| ATP synthase subunit e          |                                                                                                                                                                      |              |                                            |
|                                 | VPPVQVSPLIKFGRYS                                                                                                                                                     | Amygdala     | 1.13 ± 0.11 (2)                            |
|                                 | VPPVQVSPLIKFGRYS                                                                                                                                                     | Striatum     | 1.07 ± 0.02 (2)                            |
| ATP synthase subunit alpha      |                                                                                                                                                                      |              |                                            |
|                                 | AKLKEIVTNFLAGFEP                                                                                                                                                     | PFCx         | 0.97 ± 0.21 (3)                            |
| ATP synthase-coupling factor 6  |                                                                                                                                                                      |              |                                            |
|                                 | KFDDPKFEVIDKPQS                                                                                                                                                      | Olf Bulb     | 1.52 ± 0.10 (2)                            |
|                                 | PKFEVIDKPQS                                                                                                                                                          | Hippo        | 1.21 ± 0.01 (2)                            |
|                                 | PKFEVIDKPQS                                                                                                                                                          | Hypo         | 1.33                                       |
|                                 | PKFEVIDKPQS                                                                                                                                                          | Striatum     | 1.05 ± 0.03 (2)                            |
|                                 | PKFEVIDKPQS                                                                                                                                                          | Thalamus     | 1.27 ± 0.14 (2)                            |
| Calmodulin                      |                                                                                                                                                                      |              |                                            |
|                                 | Ac-ADQLTEEQIAEFKEAFSLFDKGDGTITTKE<br>LGTVMRSLGQNPTAEELQDMINEVDADGN<br>GTIDFPEFLTMMARKMKDSEEEIREAFR<br>VFDKDGNGYISAAELRHVMTNLGEKLTDEE<br>VDEMIREADIDGDGQVNYEEFVQMMTAK | Olf Bulb     | 1.03 ± 0.05 (14)                           |
|                                 | GDGQVNYEEFVQMMTAK                                                                                                                                                    | PFCx         | 0.98 ± 0.02 (6)                            |
|                                 | GQVNYEEFVQMMTAK                                                                                                                                                      | PFCx         | 1.02 ± 0.04 (6)                            |
|                                 | Ac-ADQLTEEQIAEFKEAFSLFD                                                                                                                                              | PFCx         | 0.98 ± 0.90 (4)                            |
|                                 | Ac-ADQLTEEQIAEFKEAFSLFDKD                                                                                                                                            | PFCx         | 1.11 ± 0.07 (6)                            |
| Cathepsin D                     |                                                                                                                                                                      |              |                                            |
|                                 | YTVFDRDNNRVGFANAVV                                                                                                                                                   | Hypo         | 1.23 ± 0.28 (3)                            |
| Clathrin light chain A          |                                                                                                                                                                      |              |                                            |
|                                 | KQAPLVH                                                                                                                                                              | Striatum     | 1.75 ± 0.06 (2)                            |
|                                 | SLKQAPLVH                                                                                                                                                            | Amygdala     | 1.08 ± 0.35 (4)                            |
|                                 | SLKQAPLVH                                                                                                                                                            | Hippo        | 1.53 ± 0.35 (2)                            |
|                                 | SLKQAPLVH                                                                                                                                                            | Hypo         | 0.82 ± 0.25 (4)                            |
|                                 | SLKQAPLVH                                                                                                                                                            | Striatum     | 1.91 ± 0.59 (4)                            |
|                                 | SLKQAPLVH                                                                                                                                                            | Thalamus     | 1.08 ± 0.25 (4)                            |
|                                 | SVLISLKQAPLVH                                                                                                                                                        | Amygdala     | 1.34 ± 0.22 (2)                            |
| Cytochrome c oxidase subunit 7B |                                                                                                                                                                      |              |                                            |
|                                 | SHQKRAPSFHDKYGNAILA                                                                                                                                                  | Amygdala     | 0.90 ± 0.17 (4)                            |
|                                 | SHQKRAPSFHDKYGNAILA                                                                                                                                                  | Hippo        | 1.94 ± 0.28 (2)                            |

|                                                       |                            |          |                 |
|-------------------------------------------------------|----------------------------|----------|-----------------|
|                                                       | SHQKRAPSFHDKYGNAILA        | Hypo     | 0.96 ± 0.11 (8) |
|                                                       | SHQKRAPSFHDKYGNAILA        | Olf Bulb | 0.64 ± 0.16 (2) |
|                                                       | SHQKRAPSFHDKYGNAILA        | Striatum | 2.62 ± 0.91 (9) |
|                                                       | SHQKRAPSFHDKYGNAILA        | Thalamus | 1.33 ± 0.33 (6) |
| Diazepam binding inhibitor (Acyl-CoA-binding protein) |                            |          |                 |
|                                                       | TVGDVNTDRPGLLDL            | Olf Bulb | 2.46 ± 0.23 (2) |
|                                                       | (ATVGDVNTDRPGLLDL)         | Olf Bulb | 2.03 ± 0.14 (2) |
|                                                       | KQATVGDVNTDRPGLLDL         | Olf Bulb | 2.02 ± 0.09 (2) |
| Dihydrolipoamide S-succinyltransferase                |                            |          |                 |
|                                                       | PRVLLLDL                   | PFCx     | 1.07 ± 0.19 (3) |
| Fibrinogen alpha                                      |                            |          |                 |
|                                                       | TDTEKGEFLSEGGVR            | Hypo     | 0.83 ± 0.15 (5) |
| FK506-binding protein 1A                              |                            |          |                 |
|                                                       | GVQVETISPGDGRTPKRGQT       | Amygdala | 1.31 ± 0.44 (4) |
|                                                       | GVQVETISPGDGRTPKRGQT       | Hippo    | 1.50 ± 0.13 (2) |
|                                                       | GVQVETISPGDGRTPKRGQT       | Hypo     | 1.22 ± 0.22 (2) |
| Macrophage migration inhibitory factor                |                            |          |                 |
|                                                       | AQATGKPAQYIAVHVVPDQL       | Hypo     | 2.14 ± 1.03 (3) |
|                                                       | AQATGKPAQYIAVHVVPDQL       | Olf Bulb | 1.38 ± 0.08 (2) |
|                                                       | DMNAANVGWNGSTFA            | Olf Bulb | 1.44 ± 0.26 (2) |
|                                                       | PMFIVNTNV                  | Hypo     | 1.98 ± 1.93 (2) |
|                                                       | PMFIVNTNVPRASVPEGFLSELTTQL | Hypo     | 1.61            |
|                                                       | PMFIVNTNVPRASVPEGFLSELTTQL | Olf Bulb | 1.38            |
| Microtubule-associated protein tau                    |                            |          |                 |
|                                                       | SPQLATLADEVASLAKQGL        | PFCx     | 0.66 ± 0.08 (3) |
| Na and Cl-dependent GABA transporter 4                |                            |          |                 |
|                                                       | GTISAITEKETHF              | Olf Bulb | 1.34 ± 0.19 (2) |
|                                                       | GTISAITEKETHF              | PFCx     | 0.96 ± 0.05 (3) |
| Peptidylprolyl isomerase A                            |                            |          |                 |
|                                                       | ADDEPLGRVSEFLF             | Olf Bulb | 1.37 ± 0.12 (2) |
|                                                       | ADKVPKTAENF                | Olf Bulb | 0.60 ± 0.05 (2) |
|                                                       | ADKVPKTAENFR               | Olf Bulb | 1.67 ± 0.03 (2) |
|                                                       | ADKVPKTAENFRAL             | Amygdala | 2.04 ± 0.46 (2) |
|                                                       | ADKVPKTAENFRAL             | Hippo    | 1.80 ± 0.11 (2) |
|                                                       | ADKVPKTAENFRAL             | Hypo     | 0.93 ± 0.24 (2) |
|                                                       | ADKVPKTAENFRAL             | Striatum | 1.66 ± 0.13 (2) |
|                                                       | ADKVPKTAENFRAL             | Thalamus | 1.41 ± 0.29 (2) |
|                                                       | EDENFILKHTGPGILSM          | Amygdala | 1.90 ± 0.26 (2) |
|                                                       | EDENFILKHTGPGILSM          | PFCx     | 0.87 ± 0.07 (3) |
|                                                       | EDENFILKHTGPGILSM          | Striatum | 2.75 ± 1.09 (5) |
|                                                       | ELFADKVPKTAENFRAL          | Amygdala | 1.87 ± 0.50 (2) |
|                                                       | ELFADKVPKTAENFRAL          | Hippo    | 1.78 ± 0.21 (2) |
|                                                       | GKVKEGMNIVEA               | Olf Bulb | 1.93 ± 0.25 (4) |
|                                                       | KHTGPGILSM                 | Amygdala | 1.52 ± 0.30 (2) |
|                                                       | KHTGPGILSM                 | Hippo    | 1.96 ± 0.08 (2) |
|                                                       | KHTGPGILSM                 | Hypo     | 1.03 ± 0.28 (2) |
|                                                       | KHTGPGILSM                 | Striatum | 2.04 ± 0.45     |
|                                                       | KHTGPGILSM                 | Thalamus | 1.59 ± 0.10 (2) |

|                                        |                                                                                      |          |                  |
|----------------------------------------|--------------------------------------------------------------------------------------|----------|------------------|
|                                        | KTEWLDGKHVVF                                                                         | Amygdala | 1.73 ± 0.19 (2)  |
|                                        | KTEWLDGKHVVF                                                                         | Hypo     | 1.09 ± 0.42 (2)  |
|                                        | KTEWLDGKHVVF                                                                         | Olf Bulb | 1.39 ± 0.03 (2)  |
|                                        | KTEWLDGKHVVF                                                                         | Striatum | 6.91 ± 3.76 (5)  |
|                                        | QGGDFTRHNGTGGRSIYGEKF                                                                | Amygdala | 2.90 ± 1.77 (2)  |
|                                        | QGGDFTRHNGTGGRSIYGEKF                                                                | Striatum | 2.21 ± 0.42 (2)  |
|                                        | VNPTVFFDIT                                                                           | Hypo     | 2.78             |
|                                        | VNPTVFFDITADDEPLGRVSF                                                                | Amygdala | 1.52             |
|                                        | VNPTVFFDITADDEPLGRVSF                                                                | Hypo     | 2.18 ± 0.63 (6)  |
|                                        | VNPTVFFDITADDEPLGRVSF                                                                | Olf Bulb | 1.52 ± 0.24 (2)  |
| Purkinje cell protein 4                |                                                                                      |          |                  |
|                                        | Ac-<br>SERQSAGATNGKDKTSGDNDGQKKVQEE<br>FDIDMDAPETERAAVAIQSQFRKFQKKKAG<br>SQS         | Olf Bulb | 1.14 ± 0.10 (6)  |
| Purkinje cell protein 4-like protein 1 |                                                                                      |          |                  |
|                                        | (Ac-<br>SELNTKTPPAANQASDPEEKGKPGSIKAE<br>EEEEIDIDLTAPETEKAALAIQGGKFRRFQKR<br>KKDSSS) | Olf Bulb | 1.07 ± 0.07 (6)  |
| Thymosin beta-10                       |                                                                                      |          |                  |
|                                        | Ac-<br>ADKPDMGEIASFDKAKLKKTETQEKNLPT<br>KETIEQEKRSSEIS                               | Olf Bulb | 1.04 ± 0.08 (6)  |
|                                        | TLPTKETIEQEKRSSEIS                                                                   | Hippo    | 0.99 ± 0.21 (2)  |
|                                        | TLPTKETIEQEKRSSEIS                                                                   | Hypo     | 1.50 ± 0.94 (2)  |
|                                        | TLPTKETIEQEKRSSEIS                                                                   | Striatum | 1.07 ± 0.26 (2)  |
| Thymosin beta-4                        |                                                                                      |          |                  |
|                                        | Ac-<br>SDKPDMAEIEKFDKSKLKKTETQEKNPLPS<br>KETIEQEKQAGES                               | Olf Bulb | 1.02 ± 0.04 (10) |
|                                        | Ac-<br>SDKPDMAEIEKFDKSKLKKTETQEKNPLPS<br>KETIEQEKQAGES                               | Hypo     | 1.21 ± 0.15 (6)  |
|                                        | Ac-<br>SDKPDMAEIEKFDKSKLKKTETQEKNPLPS<br>KETIEQEKQAGES                               | PFCx     | 1.13 ± 0.12 (10) |
|                                        | PLPSKETIEQEKQAGES                                                                    | Amygdala | 0.76 ± 0.11 (2)  |
|                                        | PLPSKETIEQEKQAGES                                                                    | Hippo    | 0.82 ± 0.10 (2)  |
|                                        | PLPSKETIEQEKQAGES                                                                    | Hypo     | 0.75 ± 0.06 (2)  |
|                                        | PLPSKETIEQEKQAGES                                                                    | Striatum | 0.93 ± 0.03      |
| Tubulin beta                           |                                                                                      |          |                  |
|                                        | KLTTPTYGDLNHLVSA                                                                     | Olf Bulb | 1.70 ± 0.12 (2)  |
|                                        | MREIVH(I/L)                                                                          | Amygdala | 1.64 ± 0.08 (2)  |
|                                        | MREIVH(I/L)                                                                          | Hippo    | 1.72 ± 0.28 (2)  |
|                                        | MREIVH(I/L)                                                                          | Hypo     | 0.90 ± 0.33 (2)  |
|                                        | MREIVH(I/L)                                                                          | Striatum | 0.90 ± 0.15 (4)  |
|                                        | MREIVH(I/L)                                                                          | Thalamus | 1.41 ± 0.21 (2)  |
|                                        | MREIVH(I/L)QA                                                                        | Amygdala | 1.68 ± 0.07 (2)  |
|                                        | MREIVH(I/L)QA                                                                        | Hippo    | 1.96 ± 0.08 (2)  |
|                                        | MREIVH(I/L)QA                                                                        | Hypo     | 0.99 ± 0.37 (2)  |

|                                                          |                               |          |                  |
|----------------------------------------------------------|-------------------------------|----------|------------------|
|                                                          | MREIVH(I/L)QA                 | Striatum | 1.77 ± 0.23 (2)  |
|                                                          | MREIVH(I/L)QA                 | Thalamus | 1.47 ± 0.15 (2)  |
|                                                          | MREIVH(I/L)QAGQ               | Amygdala | 0.81 ± 0.05 (4)  |
|                                                          | MREIVH(I/L)QAGQ               | Hippo    | 0.98 ± 0.19 (2)  |
|                                                          | MREIVH(I/L)QAGQ               | Hypo     | 2.12 ± 0.61 (6)  |
|                                                          | MREIVH(I/L)QAGQ               | Olf Bulb | 0.46 ± 0.03 (2)  |
|                                                          | MREIVH(I/L)QAGQ               | Striatum | 0.78 ± 0.16 (4)  |
|                                                          | MREIVH(I/L)QAGQ               | Thalamus | 0.84 ± 0.22      |
|                                                          | MREIVH(I/L)QAGQC+ Glutathione | Hypo     | 1.57 ± 0.71 (2)  |
|                                                          | MREIVH(I/L)QAGQC+ Glutathione | Thalamus | 0.90 ± 0.12 (2)  |
|                                                          | RSGPFGQIFRPDNF                | Olf Bulb | 1.59 ± 0.04 (2)  |
|                                                          | SVVPSPKVSDTVVEPYNA            | Olf Bulb | 1.58 ± 0.34 (2)  |
|                                                          | TTPTYGDLNHLVSA                | Olf Bulb | 1.81 ± 0.46 (2)  |
|                                                          | VPFRLH                        | Olf Bulb | 1.45 ± 0.20 (2)  |
| Ubiquinol-cytochrome c reductase complex 11 kDa protein  |                               |          |                  |
|                                                          | Cyano-CVAHKLFKNLK             | Hippo    | 1.44 ± 0.07 (4)  |
|                                                          | Cyano-CVAHKLFKNLK             | Hypo     | 1.15 ± 0.23 (6)  |
|                                                          | Cyano-CVAHKLFKNLK             | Striatum | 1.02 ± 0.10 (10) |
|                                                          | Cyano-CVAHKLFKNLK             | Thalamus | 1.11 ± 0.07 (4)  |
|                                                          | GDPKEEEEEELVD                 | PFCx     | 1.02 ± 0.01 (4)  |
|                                                          | GDPKEEEEEELVDPLTTVREH         | Amygdala | 1.01 ± 0.29 (2)  |
|                                                          | GDPKEEEEEELVDPLTTVREH         | Hypo     | 1.21 ± 0.08 (3)  |
|                                                          | GDPKEEEEEELVDPLTTVREH         | Olf Bulb | 0.81 ± 0.02 (2)  |
|                                                          | GDPKEEEEEELVDPLTTVREH         | Striatum | 0.77 ± 0.24 (2)  |
| Vesicle-associated membrane protein-associated protein A |                               |          |                  |
|                                                          | Ac-AKHEQILVLD                 | PFCx     | 1.03 ± 0.035 (2) |
|                                                          | Ac-ASASGAMAKHEQILVLD          | PFCx     | 1.07 ± 0.046 (6) |
| Voltage-dependent anion-selective channel protein 1      |                               |          |                  |
|                                                          | AGGHKLGLGLEFQA                | Amygdala | 0.75 ± 0.039 (2) |
|                                                          | AGGHKLGLGLEFQA                | Hypo     | 1.03 ± 0.26 (2)  |
|                                                          | AGGHKLGLGLEFQA                | Olf Bulb | 0.61             |
|                                                          | AGGHKLGLGLEFQA                | Striatum | 1.10 ± 0.12 (2)  |

Abbreviations: Hippo, hippocampus; Hypo, hypothalamus; PFCx, prefrontal cortex; Olf Bulb, olfactory bulb; ND, not detected.
